# Supplementary material for: Target Metabolites to Slow Down Progression of Amyotrophic Lateral Sclerosis in Mice
Source: MDPI journal article supplement (doi:10.3390/metabo12121253), 2022-12-12

## **Appendix/Supplementary**

**Figure S1. Preparation of technical replicates.** A small aliquot of each sample (colored cylinders) is pooled to create a CMTRX technical replicate sample (multi-colored cylinder), which is then injected periodically throughout the platform run. Variability among consistently detected biochemicals can be used to calculate an estimate of overall process and platform variability.

# S1

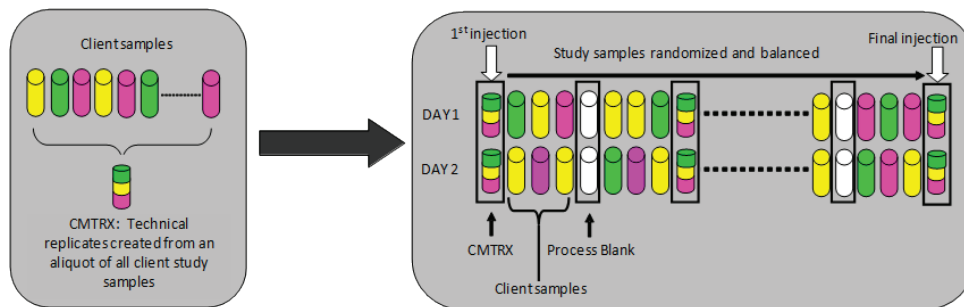

**Figure S2. IL-2, IL-4, IL-5, IL-6, TNF- $\alpha$ , and IFN- $\gamma$  in the serum of both WT and SOD1<sup>G93A</sup> mice. (A) IL-2 (B) IL-4 (C) IL-5 (D) IL-6 (E) TNF- $\alpha$  and (F) IFN- $\gamma$  levels in the serum of WT and SOD1<sup>G93A</sup> mice without or with butyrate treatment. (Data are expressed as mean  $\pm$  SD. n = 5, one-way ANOVA test).**

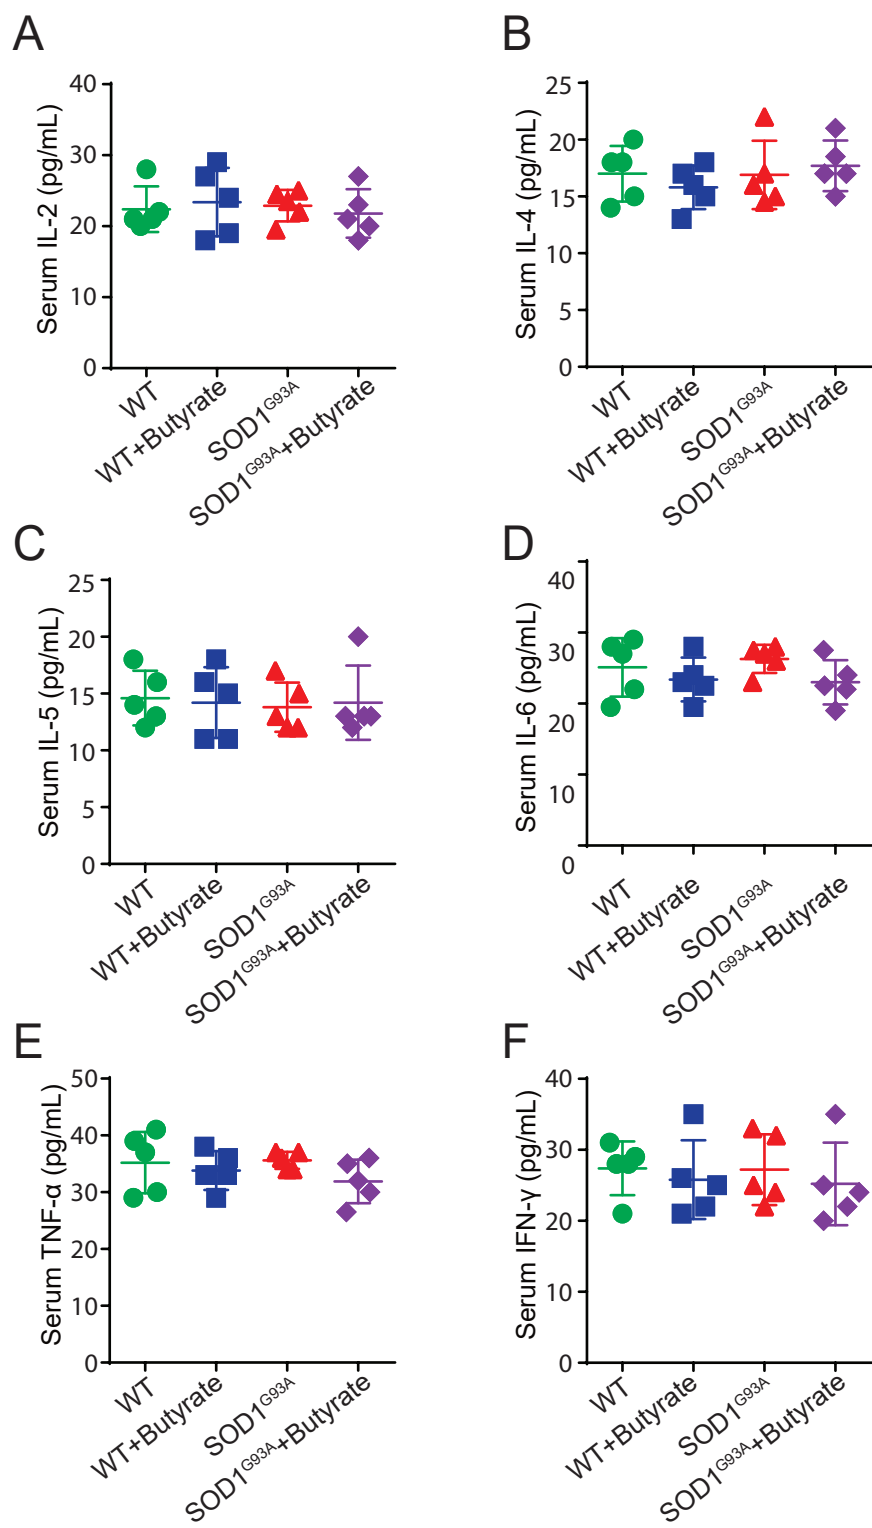

Supplement: s1 [file s1]
